# Supplementary material for: Morphology-controlled synthesis of anisotropic wurtzite MnSe nanocrystals: optical and magnetic properties
Source: Royal Society of Chemistry journal article supplement (doi:10.1039/c2ce25741f), 2012-01-01
Supplement: c2ce25741f.pdf [file c2ce25741f.pdf]

## Supporting information

### Morphology-controlled synthesis of anisotropic wurtzite MnSe nanocrystals: optical and magnetic properties

Xinyi Yang,<sup>a</sup> Yingnan Wang,<sup>a</sup> Yongming Sui,<sup>a</sup> Xiaoli Huang,<sup>a</sup> Tian Cui,<sup>a</sup> Chunzhong Wang,<sup>b</sup> Bingbing

Liu,<sup>a</sup> Guangtian Zou,<sup>a</sup> and Bo Zou\*<sup>a</sup>

<sup>a</sup> State key Laboratory of Superhard Materials, Jilin University, Changchun, 130012, China.

E-mail: zoubo@jlu.edu.cn,

<sup>b</sup> Key Laboratory of Physics and Technology for Advanced Batteries (Ministry of Education), College of Physics, Jilin University, Changchun, 130012, China

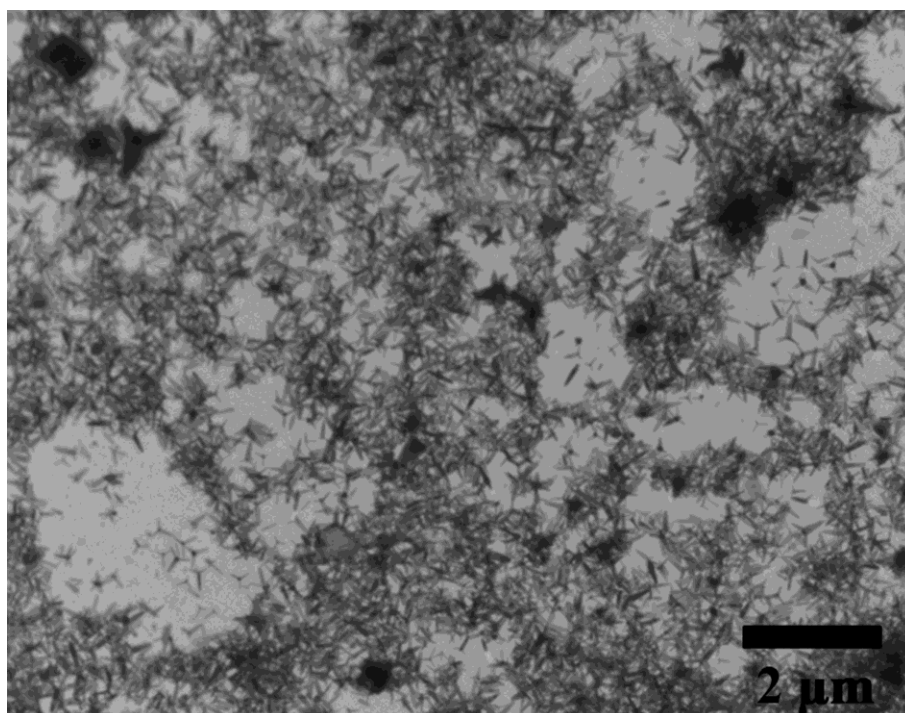

**Fig. S1** A low-magnification TEM image of the as-prepared tetrapod-shaped MnSe NCs.

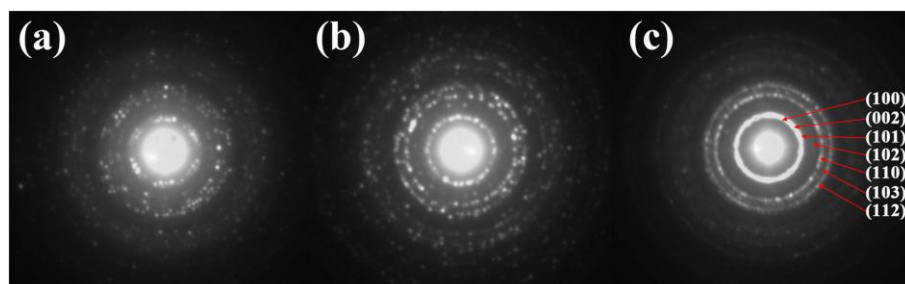

**Fig. S2** SAED patterns of WZ-MnSe NCs: (a) tetrapod-shaped MnSe NCs; (b) small waterdrop-shaped MnSe NCs; (c) large waterdrop-shaped MnSe NCs.

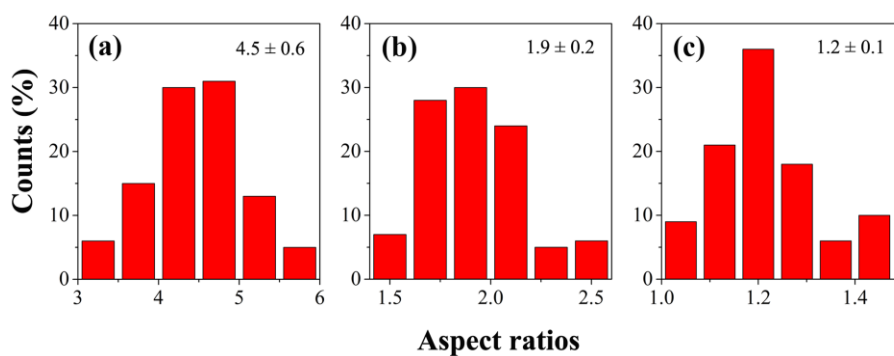

**Fig. S3** Aspect ratio histograms of WZ-MnSe NCs: (a) tetrapod-shaped MnSe NCs; (b) small waterdrop-shaped MnSe NCs; (c) large waterdrop-shaped MnSe NCs.

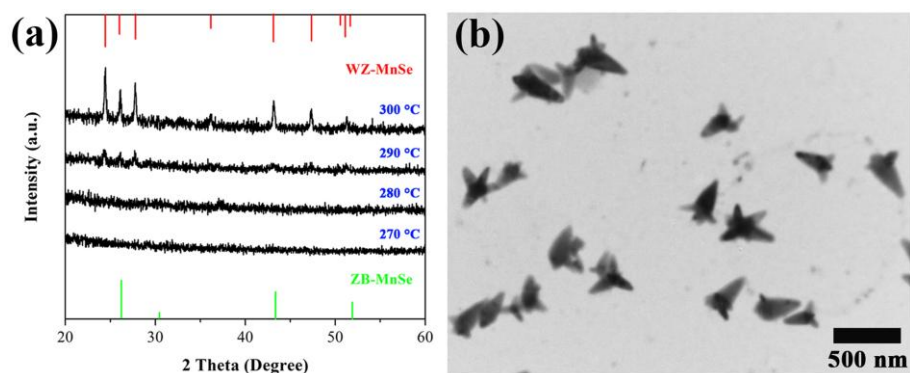

**Fig. S4** (a) XRD patterns of the products synthesized in different reaction temperatures at 0 min. (b) TEM image of the tetrapod-shaped MnSe NCs synthesized at 300 °C, 0 min.

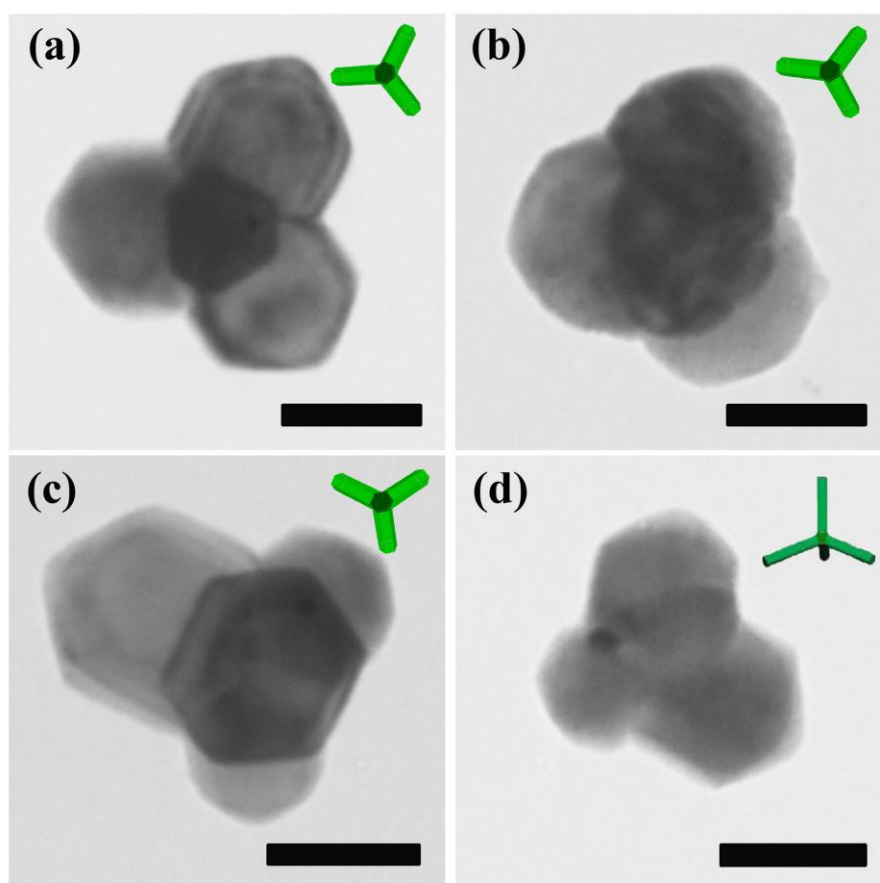

**Fig. S5** TEM images of the tetrapod-shaped MnSe NCs obtained at medium heating rate (15 °C/min), and all scale bars represent 100 nm.

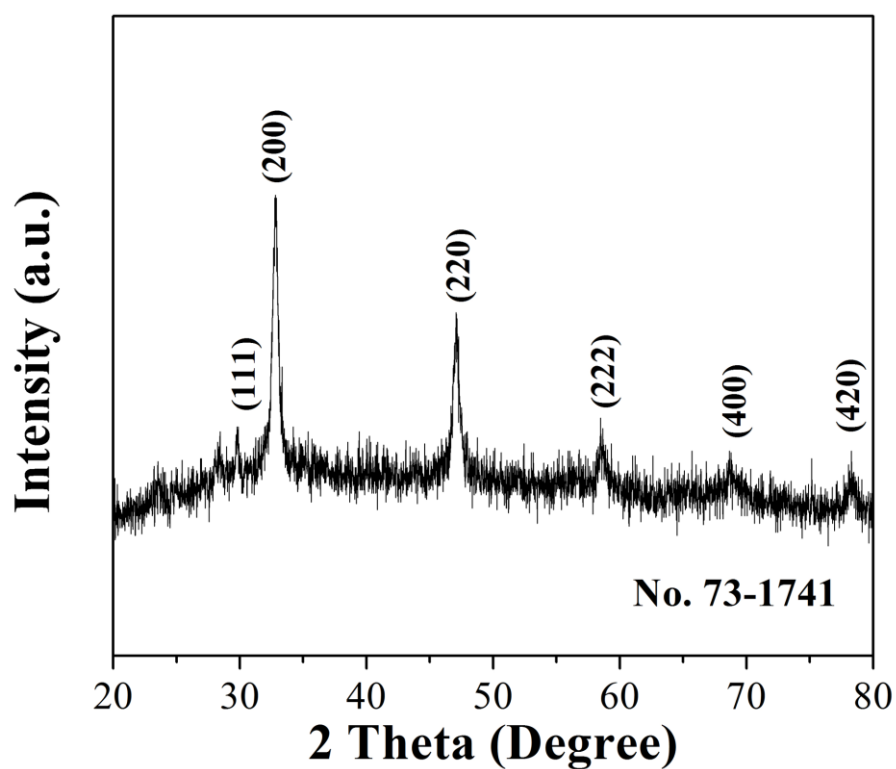

**Fig. S6** XRD pattern of the RS-MnSe NCs obtained at OA/OLA volume ratio of 1/3.

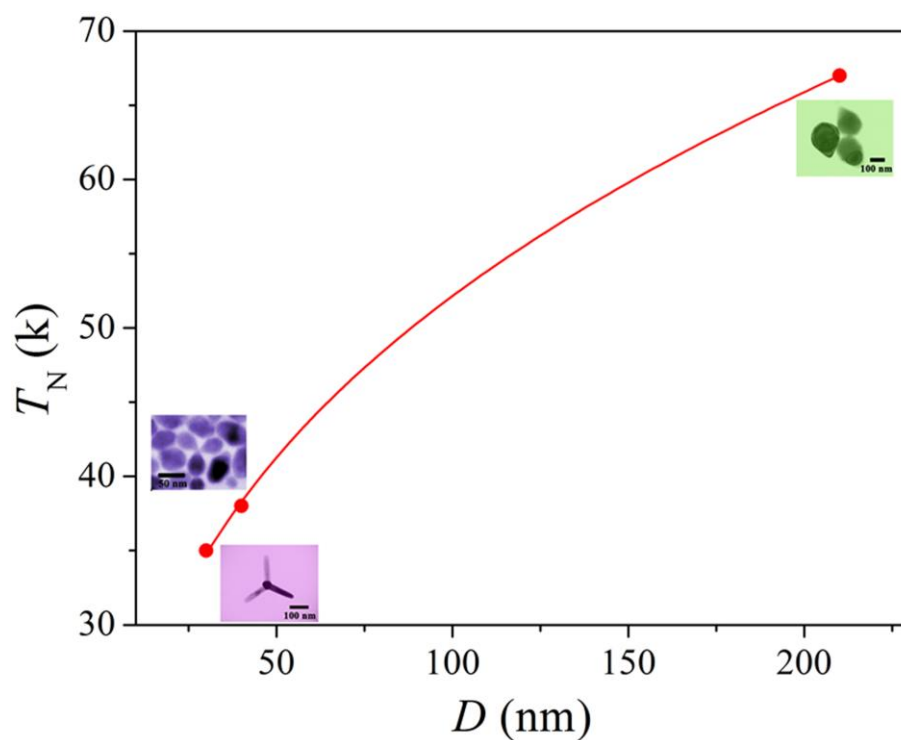

**Fig. S7** The variation of Néel temperature with different diameters in the anisotropic shaped WZ-MnSe NCs.
